# Supplementary material for: A sustainable sulfur–carbonaceous composite electrode toward high specific energy rechargeable cells
Source: Royal Society of Chemistry journal article supplement (doi:10.1039/c9mh01224a), 2019-10-15
Supplement: c9mh01224a1.pdf [file c9mh01224a1.pdf]

## Supporting information

Sustainable Sulfur-Carbonaceous Composite Electrode Toward High Specific Energy Rechargeable Cells

Yoon Hwa,<sup>1,2,†</sup> Hyo Won Kim,<sup>1,2,3,†</sup> Hao Shen,<sup>3,4</sup> Dilworth Y. Parkinson,<sup>3</sup> Bryan D. McCloskey,<sup>1,2</sup> and Elton J. Cairns<sup>1,2,\*</sup>

<sup>1</sup> Energy Storage and Distributed Resources Division, Lawrence Berkeley National Laboratory, One Cyclotron Rd., Berkeley, California, 94720, USA

<sup>2</sup> Department of Chemical and Biomolecular Engineering, University of California, Berkeley, California, 94720, USA

<sup>3</sup> Department of Advanced Materials Engineering, Kangwon National University, Samcheok 25931, Republic of Korea

<sup>4</sup> Advanced Light Source, Lawrence Berkeley National Laboratory, One Cyclotron Rd., Berkeley, California, 94720, USA

<sup>5</sup> Center for Advancing Materials Performance from the Nanoscale (CAMP-Nano), State Key Laboratory for Mechanical Behavior of Materials, Xi'an Jiaotong University, Xi'an, Shaanxi 710049, China

## Corresponding Author

\*Elton J. Cairns ([ejcairns@lbl.gov](mailto:ejcairns@lbl.gov))

## EXPERIMENTAL METHODS

1. Materials: Fine grade synthetic graphite powder (SP-1) was purchased from Bay Carbon Inc. (Bay city, MI, USA) and used as received. Sulphuric acid ( $\text{H}_2\text{SO}_4$ , 97%), hydrochloric acid (HCl, 35% in water) and acetone ( $\text{CH}_3\text{COCH}_3$ , 99.5%) from Daejung Chemicals & Metals Co. (Siheung, Korea); Hydrogen peroxide ( $\text{H}_2\text{O}_2$ , 50% in water), phosphorous pentoxide ( $\text{P}_2\text{O}_5$ , 98%), ethylenediaminetetraacetic acid (EDTA, ACS reagent), urea (ACS reagent), hydrazine monohydrate ( $\text{N}_2\text{H}_4\cdot\text{H}_2\text{O}$ , 64-65%, reagent grade 98%), ammonium hydroxide solution ( $\text{NH}_4\text{OH}$ , 28.0-30.0 %, ACS reagent), dioxolane (DOL, 99.8%), dimethoxyethane (DME, 99.9%), styrene-butadiene rubber (SBR) and carboxymethyl cellulose (CMC) and bis(trifluoromethanesulfonyl)imide lithium salt (LiTFSI) from Aldrich Chemical Co.; Lithium nitrate ( $\text{LiNO}_3$ , Anhydrous, 99.999%), N-methyl-2-pyrrolidone (NMP, 99+%), sodium sulfide ( $\text{Na}_2\text{S}$ , anhydrous) and sulfur (S, ~325 mesh, 99.5%) from Alfa Aesar were used. Potassium permanganate ( $\text{KMnO}_4$ , JUNSEI Chemical Co.), lithium metal (Li, FMC), N-methyl N-butylpyrrolidinium bis(trifluoromethanesulfonyl)imide ( $\text{PYR}_{14}\text{TFSI}$ , Coorstek), formic acid ( $\text{CH}_3\text{COOH}$ , Aqua Solutions), Super P (Timcal) and carbon nanotubes (CNT, OCSiAl) were also used as received.

2. Synthesis of *NrGO*: GO was synthesized using the modified Hummers method. The *NrGO* was prepared by a mild thermal reduction.<sup>1</sup> Briefly, GO (0.1 wt.%) was dispersed in water into a three-neck round-bottle flask by stirring for 30 min and sonication for 90 min with sonication power and frequency of 100 W and 40 KHz, respectively. After that, we performed simultaneous nitrogen doping and mild reduction of a well-dispersed GO (0.1 wt.%) in water by adding  $\text{NH}_4\text{OH}$  solution (0.01 wt.%) as a nitrogen source at 80.0 or 100.0 °C under  $\text{N}_2$  purge. After 15 hours, the product was carefully filtered and rinsed several times with ultra-purified water to

avoid unwanted gelation or aggregation, and the dispersed material was kept in water before using.

3. Synthesis of S-NrGO composite: The S-NrGO composite was prepared as follows. Briefly, 0.406 g of Na<sub>2</sub>S powder was dissolved in 17.5 mL of ultrapure water and then 0.504 g of S powder was added to the Na<sub>2</sub>S solution and stirred with a magnetic stirrer until the solution became a transparent orange-colored Na<sub>2</sub>S<sub>x</sub> solution. The prepared Na<sub>2</sub>S<sub>x</sub> solution was added to 180 ml of the prepared NrGO suspension in water (0.5 mg/ml) and stirred overnight. The as-prepared Na<sub>2</sub>S<sub>x</sub>-NrGO composite solution was slowly added to 100 mL of 2.0 M formic acid and stirred for two hours. To remove salts and impurities from the S-NrGO suspension, the supernatant was discarded followed by adding ultrapure water, repeatedly, until the pH of the suspension reached about 7.0. Finally, the S-NrGO composite in approximately 100.0 mL of water was frozen at -85.0 °C and lyophilized (Labconco) at 15.0 mtorr. For the aggregated S-NrGO composite, the S-NrGO suspension was filtered and washed with ultrapure water several times to remove salts and impurities. The obtained powder sample was dried at 50.0 °C in a vacuum oven overnight. Both the S-NrGO and the aggregated S-NrGO were heat-treated in a tube furnace at 155 °C for 18 h under an Ar atmosphere.

4. Material characterization: X-ray photoelectron spectroscopy (XPS) was performed using a monochromatized Al K $\alpha$  X-ray source (Quantum2000, Physical Electronics, Chanhassen, MN, USA). XPS used at 4 nm slot was conducted under extremely high vacuum at 10<sup>-9</sup> torr, and the average acquisition times are at about 30 min for each procedure. C1s peak data were collected to analyze the chemical structure of the NrGO. The surface area was calculated by the Brunauer-Emmett-Teller (BET) method. Nitrogen (N<sub>2</sub>) gas adsorption isotherms were measured at 77.0 K by using a surface area and porosimetry analyzer (ASAP 2020, Micromeritics Instrument Corp.,

Norcross, GA, USA). Samples were placed in the sample chamber and exposed to vacuum overnight at 60 °C to remove other gas impurities, and the dried sample weight was measured to calculate the specific area corresponding to the adsorbed amount of N<sub>2</sub>. BJH adsorption method with the Kelvin model of pore filling was used for pore size distribution analysis. Scanning helium ion microscopy (HIM, Zeiss ORION NanoFab) was carried out to observe the detailed structural morphology of the S-NrGO, aggregated S-NrGO and S-NrGO-100 composites. No sample damage was found during the observation. The morphology of the pristine and the cycled S-NrGO and S-NrGO-100 electrodes were observed using a scanning electron microscope (SEM, ZEISS Gemini Ultra 55). Thermogravimetric analysis (TGA, TA Instruments Q5000) was used to determine the content of S in the S-NrGO composites up to 600 °C under a Ar atmosphere with a temperature ramping rate of 5.0 °C/min and a gas flow rate of 60 ml/min. The contents of carbon, nitrogen and oxygen in the prepared NrGO and the NrGO-100 were determined by elemental analysis (Perkin Elmer 2400 Series II Combustion Analyzer). A Bruker Avance 500 MHz spectrometer was used to measure the solid-state <sup>13</sup>C CP/MAS NMR at 10 kHz spinning speed. Each spectrum for direct <sup>13</sup>C observation with <sup>1</sup>H decoupling was conducted 2560 scans. 1024 scans with 100 micron second time were employed for cross polarization measurements.

5. Polysulfide dissolution/adsorption test: For the polysulfide dissolution test of the S-NrGO and the aggregated S-NrGO composites 1 mg of the powder was put into a test solution composed of 1 M LiTFSI in 2 mL of DOL/DME mixture (1:1, v/v) with 1.1 mg of Li<sub>2</sub>S powder added. For the polysulfide absorption test of the NrGO, 1 mg of the NrGO powder was put into a test solution composed of 0.008 M Li<sub>2</sub>S<sub>8</sub> in 2 mL of DOL/DME mixture (1:1, v/v) overnight.

6. Micro X-ray computed tomography (micro X-ray CT): The synchrotron micro X-ray CT experiment is performed on Beamline 8.3.2 in Advanced Light Source (ALS). All electrodes are

casted on the Al foils and powder samples were put into Kapton tubes, and scanned by the 24 keV monochromatic X-ray beam. The resolution is around 1  $\mu\text{m}$ . Then the raw data was analyzed by ImageJ and the 3D model was reconstructed by using the software Avizo.

7. Electrochemical tests: The S-NrGO electrodes ( $\leq 3 \text{ mgS cm}^{-2}$ ) were prepared by mixing the S-NrGO composite and Super P with a binder (SBR:CMC=1:1,  $w/w$ ) at a weight ratio of 64:28:8 in ultrapure water. The slurries were stirred using a magnetic stirrer overnight and cast *via* a doctor blade onto an aluminum foil. For the high sulfur loading S-NrGO electrodes ( $> 6 \text{ mgS/cm}^2$ ), the slurry formula was modified as follows: S-NrGO composite:Super P:CNT:SBR/CMC = 74.1:17.5:0.4:8.0. The weight ratio between SBR and CMC is 1:1. The electrodes were dried at room temperature for 6.0 h, and then dried in a vacuum oven at 50.0  $^{\circ}\text{C}$  overnight to fully eliminate residual water. Two different electrolytes composed of 1.0 M LiTFSI and 0.21 M  $\text{LiNO}_3$  in  $\text{PYR}_{14}\text{TFSI/DOL/DME}$  (2:1:1,  $v/v/v$ ) and 1.0 M LiTFSI and 0.5 M  $\text{LiNO}_3$  in  $\text{DOL/DME}$  (1:1,  $v/v$ ) were used for the low S mass loading electrodes and the high mass loading electrodes, respectively. Addition of ionic liquid in the electrolyte helps to improve cell cycle life and Coulombic efficiency because low polysulfide solubility and high viscosity of ionic liquid suppresses polysulfide shuttle effect.<sup>1,2</sup> Coin cells (2032-type) were fabricated with a Li metal foil as counter/reference electrode and a porous polypropylene separator (Celgard 2400) in a glovebox filled with Ar gas. The amount of the electrolyte was adjusted depending on the S mass loading of the S electrode to achieve the desired E/S ratio. Galvanostatic cycling tests of the coin cells were performed using a battery cycler (Maccor) at a given current density. The electrochemical impedance was measured from 10 mHz to 1 MHz using a potentiostat (Biologic VSP) at the charged state. For ex-situ UV-Vis tests, the cells were collected at the fully discharged state (1.7 V) or the charged state (2.7 V) and disassembled immediately. Then, all

cell components that contain electrolyte (cathode can, S electrode, spacer, separator, Li electrode) were put into the DOL/DME mixture (1:1, v/v) to collect all of the electrolyte from the cycled cell. The collected electrolyte solution was tested by UV-Vis spectroscopy. For the catholyte cell test, the *NrGO* electrodes were prepared by mixing the *NrGO* (or the aggregated *NrGO*) and PVDF as a binder at a weight ratio of 70:30 in NMP. The electrolyte was composed of DOL:DME (1:1, v/v) with 1 M LITFSI and 0.008 M  $\text{Li}_2\text{S}_8$ .

## Supplementary Figures

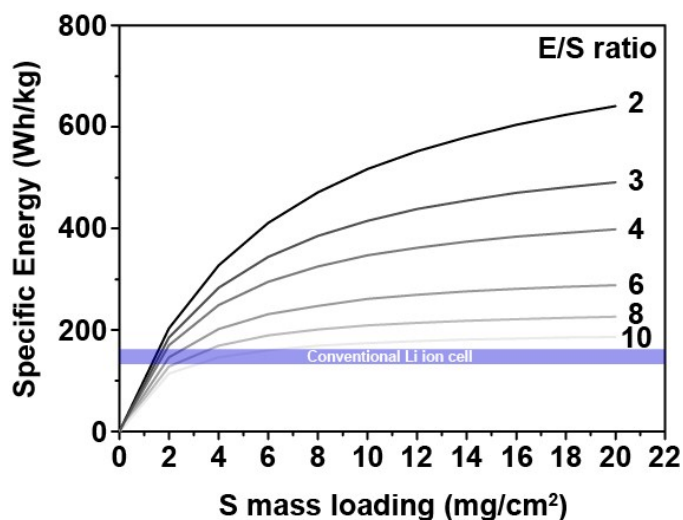

**Fig. S1** Specific energy design calculation for Li/S pouch cells.

The specific energy of pouch cells was estimated under the assumptions: specific capacity of 1000 mAh/gS; Nominal cell voltage of 2.15 V, two times larger stoichiometric amount of lithium required for 1000 mAh/gS; aluminum (thickness: 17  $\mu\text{m}$ ) and copper foil current collectors (thickness: 15  $\mu\text{m}$ ) for sulfur and lithium electrodes, respectively; the weight of pouch, Ni and Al tabs and separator are included; electrode area of 84.0  $\text{cm}^2$ ; six sulfur laminates.

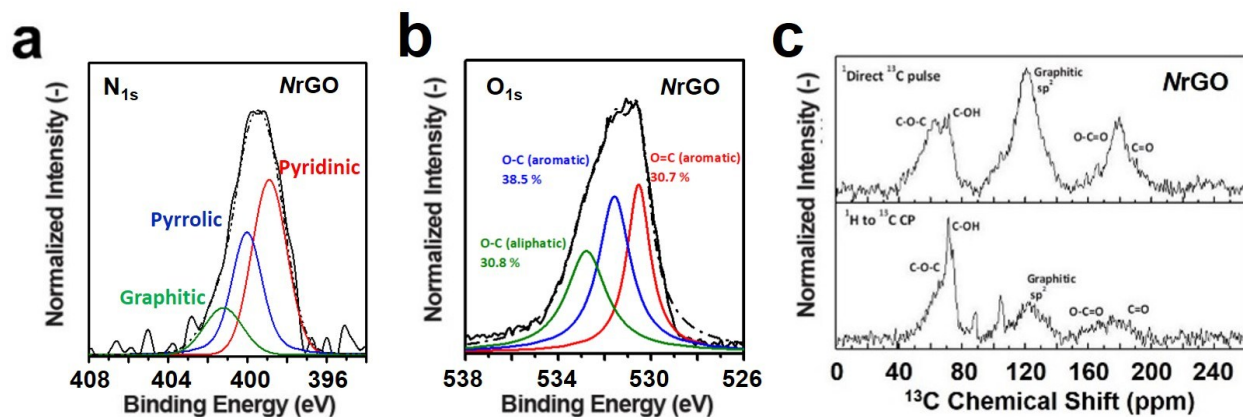

**Fig. S2** (a)  $\text{N}_{1s}$  and (b)  $\text{O}_{1s}$  XPS spectra of the NrGO. (c) Solid-state  $^{13}\text{C}$  CP/MAS NMR spectra of the NrGO.

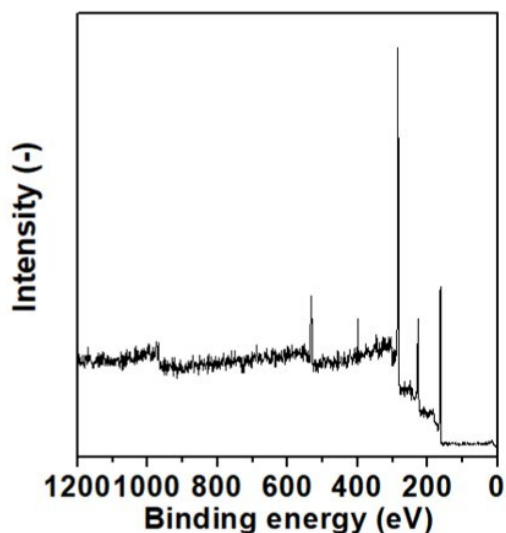

**Fig. S3** XPS survey scan of the S-NrGO composite.

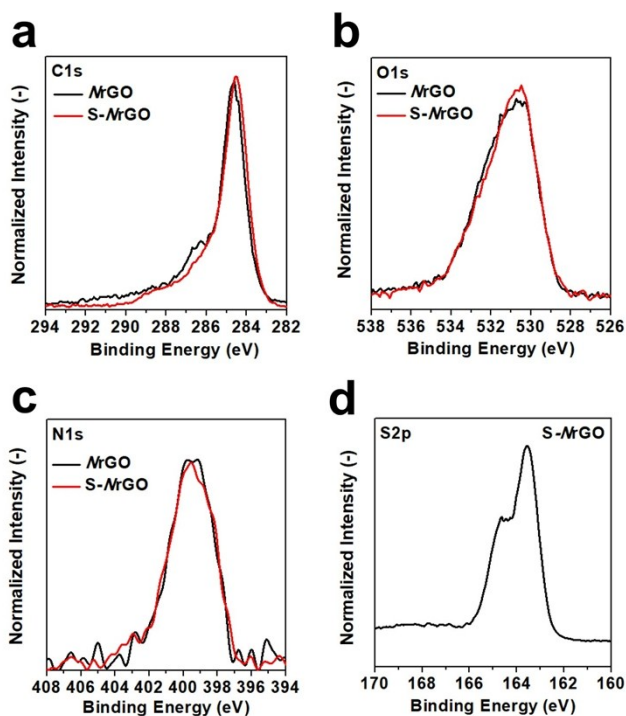

**Fig. S4** XPS results of the NrGO and the S-NrGO composite. (a) C<sub>1s</sub>, (b) O<sub>1s</sub> and (c) N<sub>1s</sub> XPS spectra. (d) S<sub>2p</sub> XPS spectra of the S-NrGO composite.

As shown in Fig. S4a-S4c, XPS spectra of the as-prepared NrGO and the NrGO in the S-NrGO composite are almost same, which means that the chemical structure of the NrGO was maintained after S deposition process. The S<sub>2p</sub> XPS spectra of the S-NrGO composite (Fig. S4d) indicates existence of elemental sulfur in the S-NrGO composite.



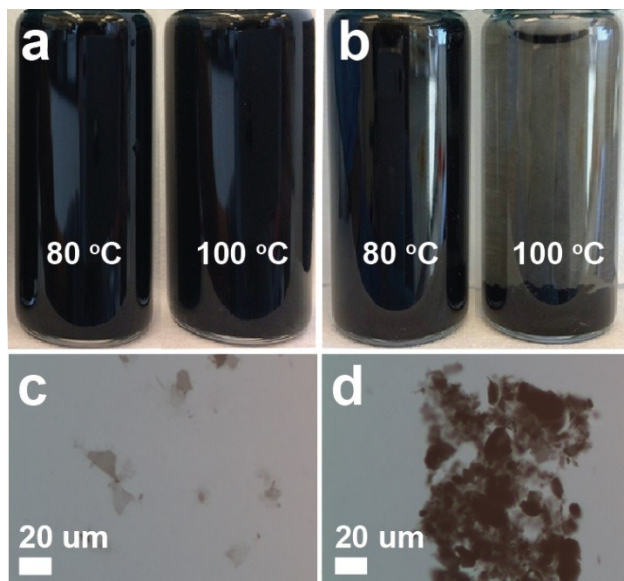

**Fig. S5** Photo of the *NrGO* suspensions. (a) Just sonicated and (b) after two days. Optical microscope images of the *NrGO* suspensions prepared at (c) 80.0 °C and (d) 100.0 °C.

As shown in Fig. S5a and S5b, the *NrGO* suspension prepared at 80.0 °C is very stable, whereas the *NrGO* flakes prepared at 100 °C obviously settled after two days. Very thin and individual *NrGO* flakes were easily found in the *NrGO* suspension prepared at 80.0 °C under the optical microscope, which is in contrast to the *NrGO* flakes synthesized at 100.0 °C, where the flakes are severely aggregated.

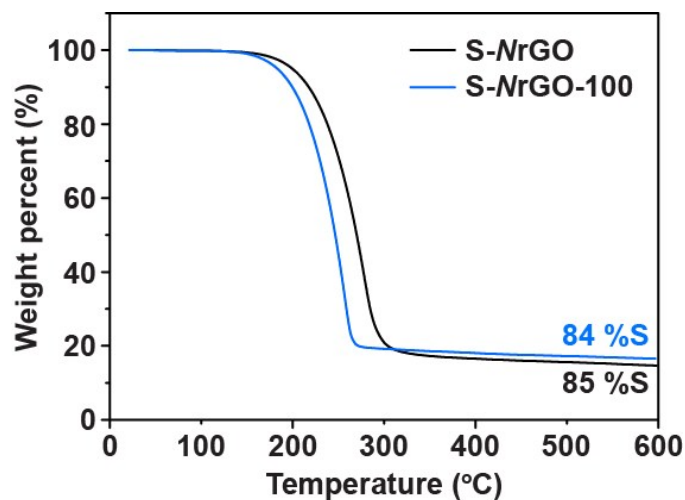

**Fig. S6** TGA result of the S-*NrGO* and the S-*NrGO*-100 composites under Ar atmosphere with a temperature ramping rate of 5.0 °C/min.

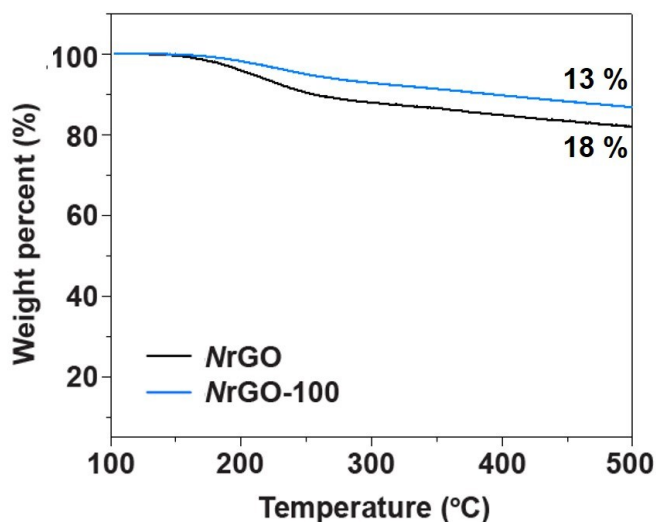

**Fig. S7** TGA result of the *NrGO* and the *NrGO-100* composites under Ar atmosphere with a temperature ramping rate of 5.0 °C/min.

As shown in Fig. S6, 15 wt. % remains after TGA analysis of the S-*NrGO*. Considering that 82 wt. % remains after the TGA analysis of the *NrGO* (Fig. S7), the maximum weight loss contribution of the *NrGO* ( $x$ ) for the TGA analysis of the S-*NrGO* can be estimated by  $15 \text{ wt. \%} : x \text{ wt. \%} = 82 \text{ wt. \%} : 18 \text{ wt. \%}$ . Thus, 3.3 wt.% loss for the S-*NrGO* composite could be attributed to the *NrGO*, in maximum. Through the same calculation for the S-*NrGO-100* composite, 2.4 wt.% is obtained. However, it is unlikely these maximum values are fully considered because (1) according to the previous report,<sup>1</sup> partial reduction of GO may occur during the synthesis of the S-GO composite involving  $\text{Na}_2\text{S}_x$  as a source of sulfur; (2) if evolution of  $\text{CO}_2$  gas occurs during TGA analysis of the S-*NrGO* and the S-*NrGO-100* composites in accordance with the amount of oxygen present in the *NrGO* and *NrGO-100*, the S-*NrGO* composite should exhibit more obvious weight loss around 150-200 °C than the S-*NrGO-100* composite during the TGA analysis, since the *NrGO* has higher oxygen content and showed steeper weight decrease than the *NrGO-100* (Fig. S7), which does not correspond to the TGA results of the S-*NrGO* and S-*NrGO-100* composite. Consequently, the contribution of the *NrGO* and the *NrGO-100* to the weight loss of their sulfur composite during the TGA analyses, is less than 3.3 wt.% and 2.4 wt.% respectively.

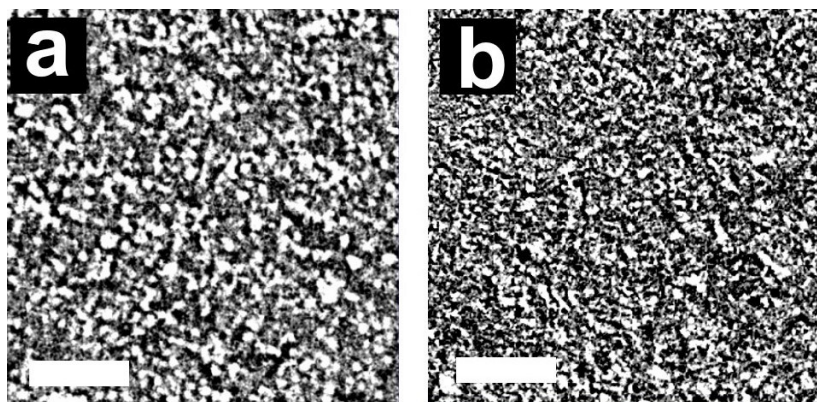

**Fig. S8** Gray-scale in-plane cross section of (a) the S-NrGO electrode and the S-NrGO-100 electrode. (Scale bar: 100  $\mu\text{m}$ , subvolume: 400  $\mu\text{m}$   $\times$  400  $\mu\text{m}$   $\times$  50  $\mu\text{m}$ ).

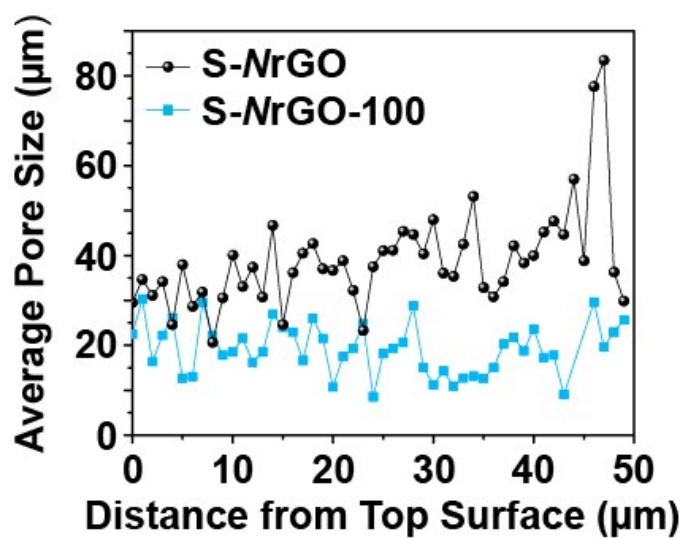

**Fig. S9** Porosity estimation results of the S-NrGO and the S-NrGO-100 electrodes obtained from micro X-ray CT results.

The porosity for the 50  $\mu\text{m}$  thickness range of the electrodes (from top surface to the interior of the electrodes) was evaluated and an average value is taken every 5 frames.

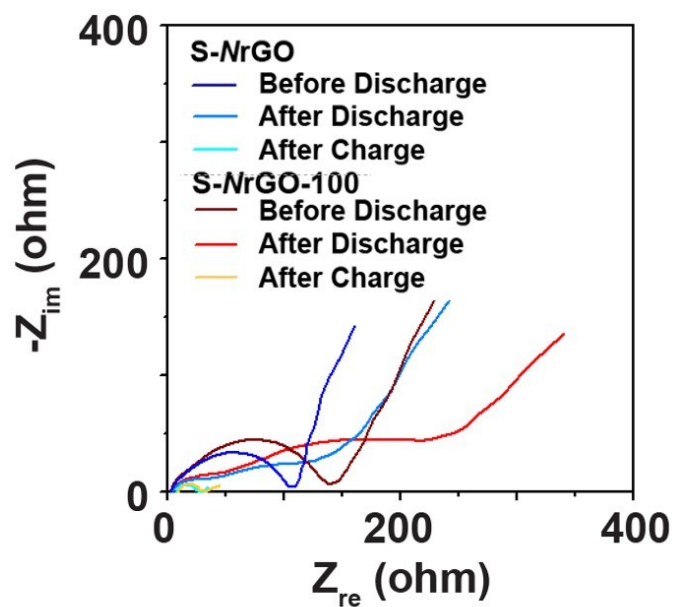

**Fig. S10** Electrochemical behavior of the S-NrGO and the S-NrGO-100 electrodes. Nyquist plots obtained in the frequency range of 10.0 mHz to 1.0 MHz. The electrolyte was composed of 1 M LITFSI and 0.5 M LiNO<sub>3</sub> in DOL:DME (1:1, v/v). The sulfur mass loading of the electrodes is ~ 7.2 mgS/cm<sup>2</sup>. The E/S ratio was 5.

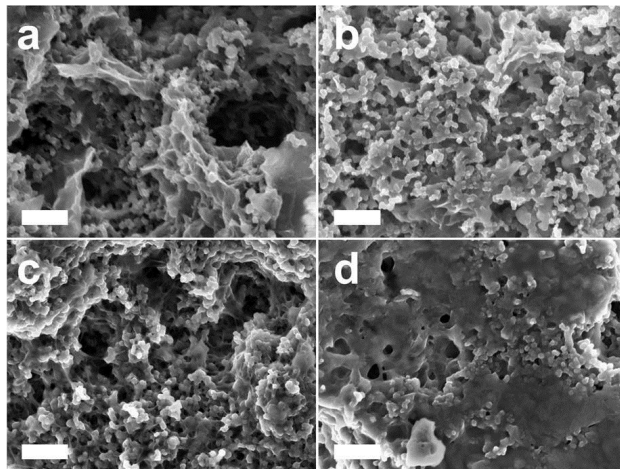

**Fig. S11** SEM images of the S-NrGO and the S-NrGO-100 electrodes. Pristine: (a) S-NrGO and (b) S-NrGO-100 electrodes. The electrodes after complete discharge and charge processes: (c) the S-NrGO and (d) the S-NrGO-100 electrode. The electrodes were cycled with an electrolyte composed of 1.0 M LITFSI and 0.5 M LiNO<sub>3</sub> in DOL:DME (1:1, v/v). Sulfur mass loading of the electrodes is ~ 7.2 mgS/cm<sup>2</sup>. E/S ratio was 5. (scale bar: 200 nm)

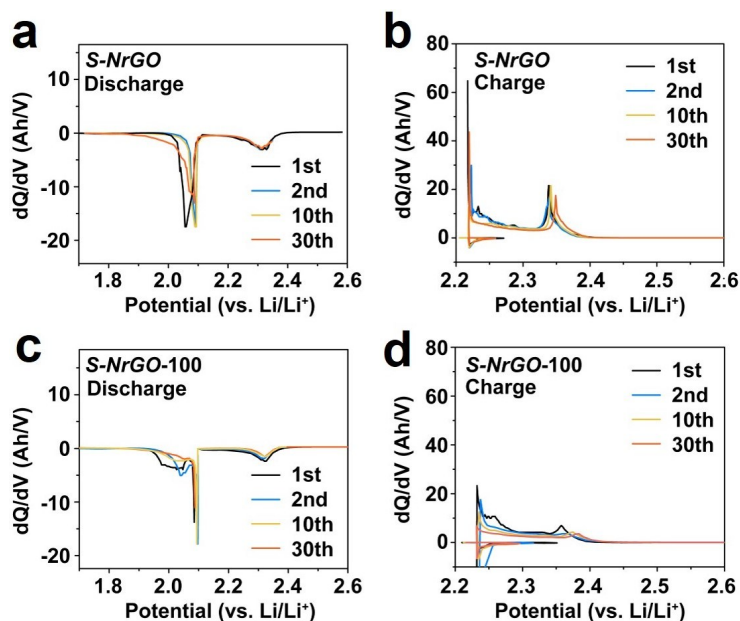

**Fig. S12 Differential capacity plots.** (a) Discharge and (b) charge process the S-NrGO at 0.1 C. (c) Discharge and (d) charge process the S-NrGO-100 electrodes at 0.1 C. The electrolyte was composed of 1 M LITFSI and 0.5 M LiNO<sub>3</sub> in DOL:DME (1:1, v/v). The sulfur mass loading of the electrodes is ~ 6.2 mgS/cm<sup>2</sup>. The E/S ratio was 4.

As shown in the differential capacity plots (DCP) of the S-NrGO electrode (Fig. S12a and S12b) obtained from galvanostatic cycling test results (Fig. 4b), the S-NrGO electrode maintains the shape of the DCP peaks after the first discharge process. Due to the absence of lithium polysulfide in the electrolyte at the beginning of the cycling, some portion of the dissolved sulfur in the form of lithium polysulfides is not reduced at the sulfur electrode until the end of the discharge process which results in an initial capacity loss. Once lithium polysulfide is present in the electrolyte, the shape of the DCP peak is maintained, unless there are other factors strongly influencing the electrochemical process (e.g. reconfiguration of sulfur electrode causing an increase of the cell impedance, simultaneous loss of sulfur from the sulfur electrode due to the polysulfide shuttle effect) While the S-NrGO electrode maintains the shape of the DCP peaks for 30 cycles, the S-NrGO-100 electrode exhibited significant deformation and intensity decrease of the DCP peaks (Fig. S12c and 12d), indicating that continuous irreversible change occurs during cycling.

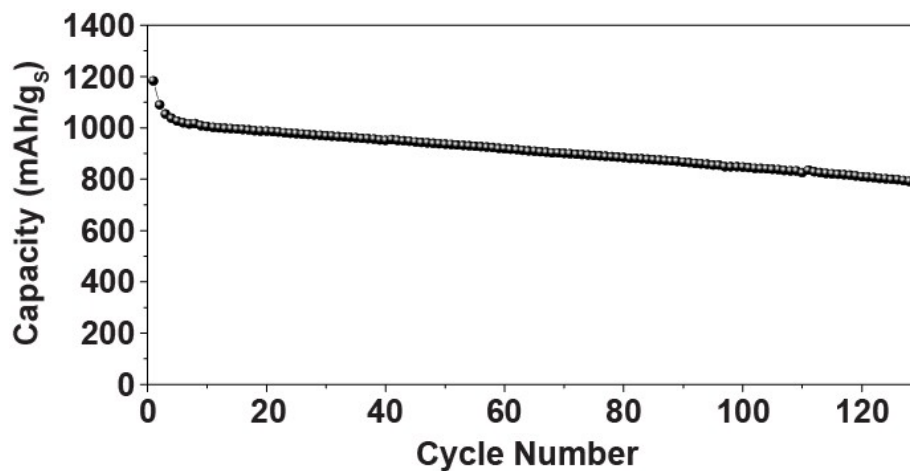

**Fig. S13** Cycling performance of the S-NrGO electrode. The electrolyte was composed of 1.0 M LiTFSI and 0.5 M LiNO<sub>3</sub> in DOL:DME (1:1, v/v). The sulfur mass loading of the electrodes was 3.0 mgS/cm<sup>2</sup>. The E/S ratio was 5.

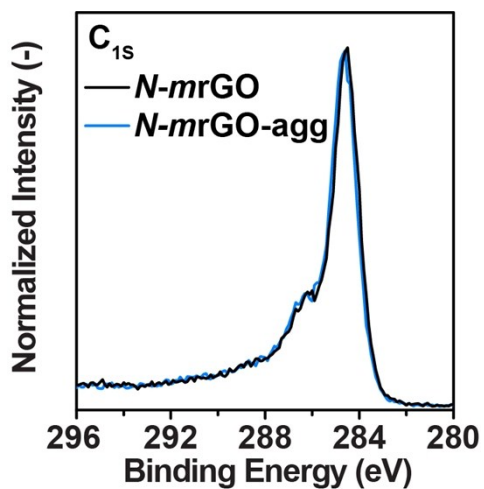

**Fig. S14.** XPS results of the NrGO and the aggregated NrGO composites.

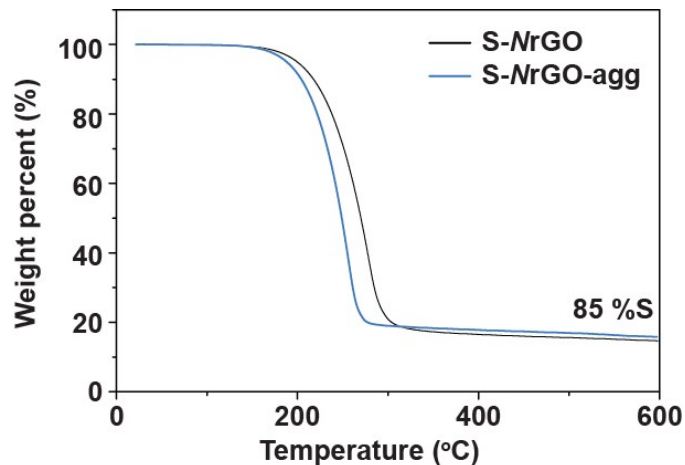

**Fig. S15** TGA results of the S-NrGO and the aggregated S-NrGO composites under Ar atmosphere with a temperature ramping rate of 5.0 °C/min.

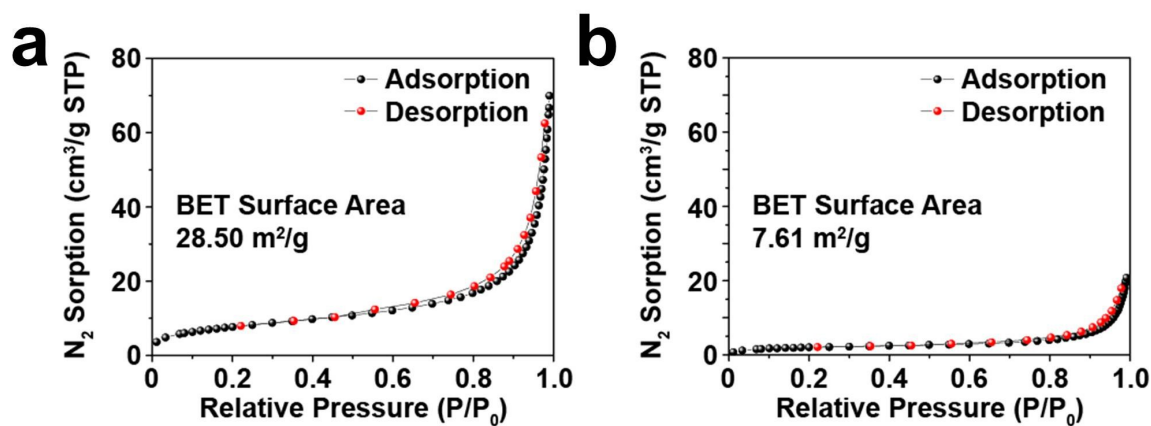

**Fig. S16** BET surface area measurement results of (a) the S-NrGO and (b) the aggregated S-NrGO composites.

Both exhibit Type 2 behavior with no hysteresis that is a typical isotherm of macroporous structure, but the S-NrGO shows more high and clear B point at 0.1 of  $P/P_0$  than the aggregated S-NrGO. The B point of the  $N_2$  adsorption/desorption isotherm generally indicates complete monolayer coverage. This obvious B point of the S-NrGO combined with the HIM image supports a fact that our lyophilization process makes a reticulated porous structure, which promotes reversible transport of  $Li^+$  within the sulfur electrode. On the other hand, an unclear B point is observed for the aggregated S-NrGO indicating that a common drying process using thermal treatment leads to a non-porous and closed structure.

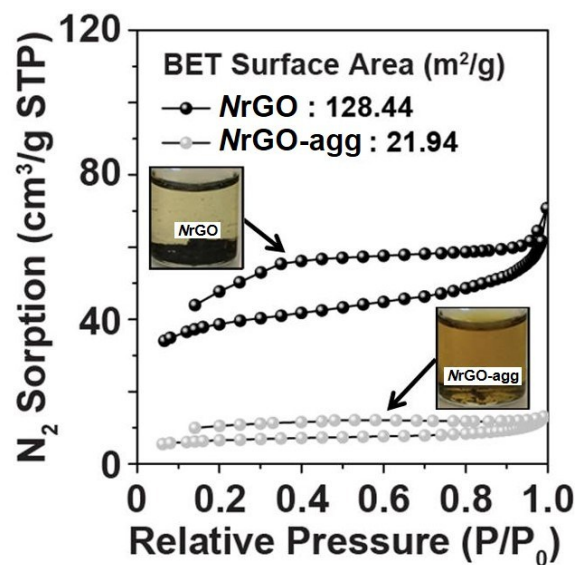

**Fig. S17** BET surface area measurement results of the NrGO and the aggregated NrGO powders. (Inset photo: Polysulfide absorption test results of the NrGO and the aggregated NrGO powder)

For the polysulfide absorption test of the NrGO, 1 mg of the NrGO powder was put into a test solution composed of 0.008 M  $\text{Li}_2\text{S}_8$  in 2 mL of DOL/DME mixture (1:1, v/v). The polysulfide test solution of the NrGO powder was almost colorless, which is indicative of the depletion of the polysulfides in the test solution, while the test solution color of the aggregated NrGO powder remained dark orange.



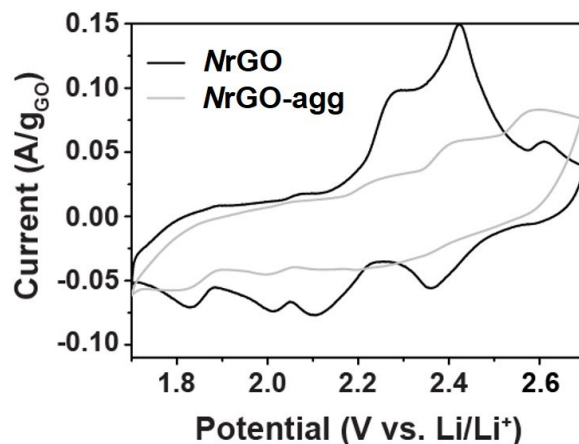

**Fig. S18** Cyclic voltammetry test results of the *NrGO* and the aggregated *NrGO* electrodes at 0.1 mV/s. The electrolyte was composed of DOL:DME (1:1, v/v) with 1.0 M LITFSI and 0.008 M Li<sub>2</sub>S<sub>8</sub>.

Cyclic voltammetry (CV) results of the *NrGO* and the aggregated *NrGO* electrodes with a catholyte containing 0.008 M nominal Li<sub>2</sub>S<sub>8</sub> are consistent with the chemical polysulfide adsorption tests, where the *NrGO* electrode exhibited distinct cathodic and anodic peaks during the discharge and charge processes, whereas the aggregated *NrGO* electrode showed cathodic and anodic peak shifts due to the larger overpotential of the aggregated *NrGO* electrode. Considering the fact that both the *NrGO* and the aggregated *NrGO* powder have the same chemical structure (Fig. S13), the results emphasize that the reticulated structure of the *NrGO* in the electrode is vital to fully utilize its effectiveness.

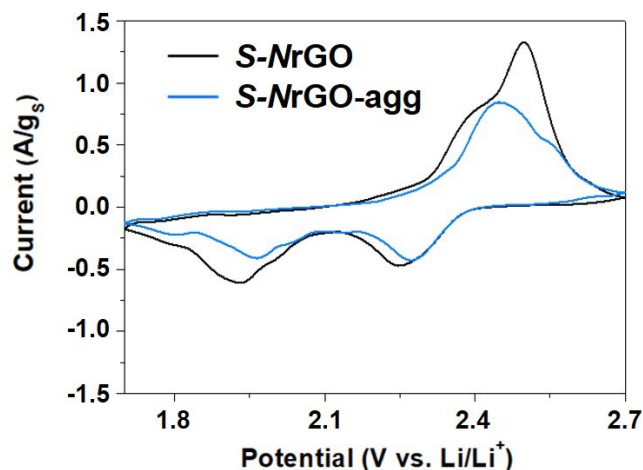

**Fig. S19** Cyclic voltammety test results of the S-NrGO and the aggregated S-NrGO electrodes at 0.1 mV/s. The electrolyte was composed of DOL:DME (1:1, v/v) with 1.0 M LITFSI and 0.5 M LiNO<sub>3</sub>.

Cyclic voltammety (CV) results of the S-NrGO and the aggregated S-NrGO electrodes are shown in Fig. S18. Both the S-NrGO and the aggregated S-NrGO electrodes exhibited distinct redox peaks during the cycling, however, the redox peaks of the S-NrGO electrode showed significantly sharper and larger specific current, indicating faster and more active electrochemical reaction of the S-NrGO than the aggregated S-NrGO electrode.

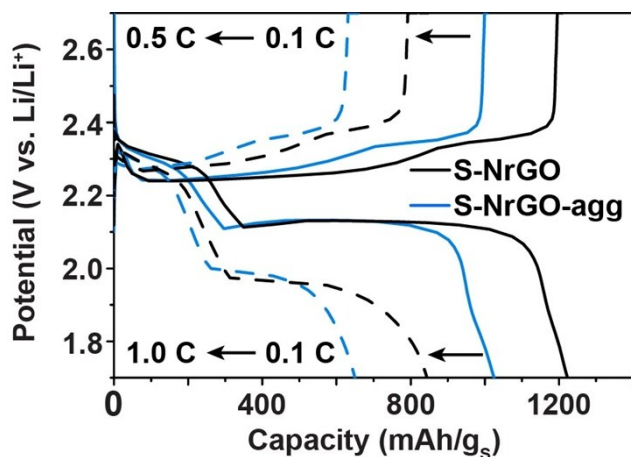

**Fig. S20** Voltage profiles of the S-NrGO and the aggregated S-NrGO electrodes. Electrode loading was  $\sim 1.0$  mgS/cm<sup>2</sup>. Electrolyte was composed of PYR<sub>14</sub>TFSI:DOL:DME (2:1:1, v/v/v) with 1.0 M LITFSI and 0.21 M LiNO<sub>3</sub>. The cells were cycled at 0.1 C and 1.0 C for the first cycle and the following cycles, respectively.

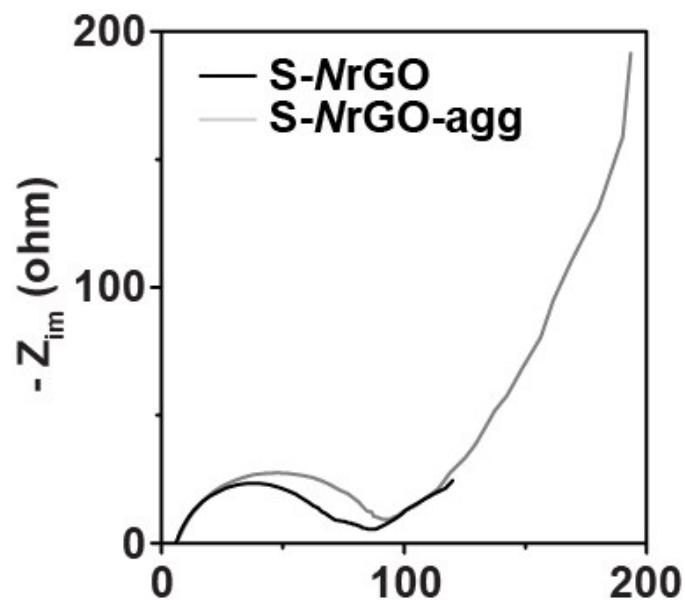

**Fig. S21** Electrochemical impedance spectroscopy results of the S-NrGO and the aggregated S-NrGO electrodes. Nyquist plots obtained in the frequency range of 10.0 mHz to 1.0 MHz. Electrode loading was  $\sim 1.0$  mgS/cm<sup>2</sup>. Electrolyte was composed of PYR<sub>14</sub>TFSI:DOL:DME (2:1:1, v/v/v) with 1.0 M LITFSI and 0.21 M LiNO<sub>3</sub>.

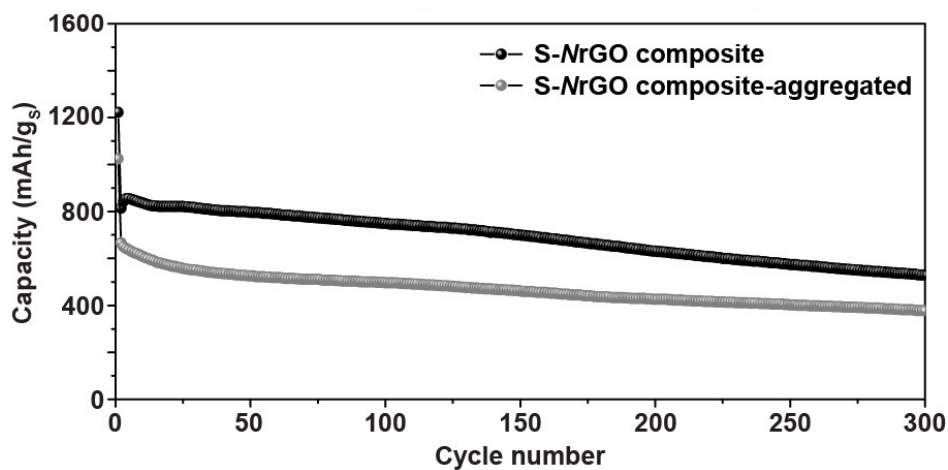

**Fig. S22** Galvanostatic cycling test results of the S-NrGO and the aggregated S-NrGO electrodes. Electrode loading was  $\sim 1.0$  mgS/cm<sup>2</sup>. Electrolyte was composed of PYR<sub>14</sub>TFSI:DOL:DME (2:1:1, v/v/v) with 1.0 M LITFSI and 0.21 M LiNO<sub>3</sub>. The cells were cycled at 0.1 C and 1.0 C for the first cycle and the following cycles, respectively.

**Table S1** Current state-of-the-art of sulfur electrodes (> 3 mgS/cm<sup>2</sup>) with a conventional aluminum foil current collector that were cycled at least 25 cycles.

| Ref.      | S loading (mg/cm <sup>2</sup> ) | S Content <sup>a</sup> (wt.%) | E/S ratio (μl/mgS) | Peak capacity (mAh/gS) | Current                 | Energy <sup>b</sup> (Wh/kg) |
|-----------|---------------------------------|-------------------------------|--------------------|------------------------|-------------------------|-----------------------------|
| This Work | 6.2                             | 63.0                          | 4.0                | 1180.0                 | 0.3 mA/cm <sup>2</sup>  | 324.6                       |
| #1        | 4.0                             | 70.0                          | 5.0                | 1300.0                 | 0.2 mA/cm <sup>2</sup>  | 289.8                       |
| #2        | 6.7                             | 76.0                          | 5.0                | 1120.0                 | 0.67 mA/cm <sup>2</sup> | 286.3                       |
| #3*       | 3.0                             | 69.8                          | 7.0                | 1419.0                 | C/20                    | 242.6                       |
| #4        | 5.5                             | 72.0                          | 7.0                | ~1200.0                | 0.65 mA/cm <sup>2</sup> | 237.9                       |
| #5        | 4.0                             | 64.0                          | 5.0                | 860.0                  | C/10                    | 189.1                       |
| #6*       | 10.0                            | 42.2                          | 13.0               | 1332.0                 | C/10                    | 169.3                       |
| #7*       | 13.9                            | 55.0                          | 15.0               | 1383.0                 | C/20                    | 164.7                       |
| #8        | 4.0                             | 60.0                          | 15                 | 1400.0                 | C/50                    | 151.4                       |
| #9        | 4.0                             | 56.8                          | 15.0               | 1200.0                 | C/5                     | 129.2                       |
| #10       | 3.2                             | 64.0                          | 12.5               | 1017.0                 | C/10                    | 121.7                       |
| #11       | 4.6                             | 60.0                          | 15                 | 1097.0                 | C/5                     | 120.8                       |
| #12*      | 3.0                             | 52.0                          | 30.0               | 1000.0                 | 0.6 mA/cm <sup>2</sup>  | 59.6                        |
| #13*      | 3.37                            | 62.1                          | 40                 | 860.0                  | C/5                     | 40.7                        |
| #14*      | 4.5                             | <80.0                         | <33.3              | 621.0                  | C/5                     | 35.6                        |
| #15       | 4.7                             | 80.0                          | Unknown            | ~1250.0                | C/20                    | N/A                         |
| #16       | 4.2                             | 70.0                          | Unknown            | 1100.0                 | 0.35 mA/cm <sup>2</sup> | N/A                         |
| #17*      | 3.5                             | <48.2                         | Unknown            | ~1400.0                | C/5                     | N/A                         |
| #18       | 3.5                             | 49.7                          | Unknown            | 1147.0                 | C/5                     | N/A                         |
| #19       | 3.0                             | 72.0                          | Unknown            | 860.0                  | C/10                    | N/A                         |
| #20       | 3.95                            | 64.3                          | Unknown            | 956.0                  | C/5                     | N/A                         |
| #21*      | 3.0                             | 54.5                          | Unknown            | 1290.0                 | C/5                     | N/A                         |
| #22       | 3.0                             | 80.0                          | Unknown            | 1123.0                 | C/10                    | N/A                         |

a: S content calculation includes the weight of the interlayer

b: Specific energy estimated with consideration of following parameters:

S loading; S content; Electrolyte weight (assumption: density of electrolyte as 1); Peak capacity; working potential (2.15 V); Aluminum foil weight (6.0 mg/cm<sup>2</sup>); Copper foil weight (4.0 mg/cm<sup>2</sup>); Li metal weight (mole ratio between sulfur and lithium=1:2); Separator weight (1.13 mg/cm<sup>2</sup>).

\*: The cell includes an interlayer(s) or a specially-coated separator)

**Table S2** Content of carbon, nitrogen and oxygen in the prepared NrGO and the NrGO-100 samples demonstrated by elemental analysis.

| Element  | Carbon | Nitrogen | Oxygen |
|----------|--------|----------|--------|
| NrGO     | 77.94  | 5.04     | 17.02  |
| NrGO-100 | 80.55  | 6.33     | 13.12  |

## Supporting References for Experimental Section

1. H. W. Kim, M. B. Ross, N. Kornienko, L. Zhang, J. Guo, P. Yang & B. D. McCloskey *Nat. Catal.* 2018, **1**, 282.

## Supporting References for Supplementary Figures

1. A. Kawase and E. J. Cairns, *J. Electrochem. Soc.*, 2018, **165**, A3257-A3262.

## Supporting References for Table S1

1. S. Chen, Y. Gao, Z. Yu, M. L. Gordin, J. Song and D. Wang, *Nano Energy*, 2017, **31**, 418.
2. F. Zeng, A. Wang, W. Wang, Z. Jin and Y.-S. Yang, *J. Mater. Chem. A*, 2017, **5**, 12879.
3. F. Zeng, Z. Jin, K. Yuan, S. Liu, X. Cheng, A. Wang, W. Wang and Y.-S. Yang, *J. Mater. Chem. A*, 2016, **4**, 12319.
4. F. Zeng, W. Wang, A. Wang, K. Yuan, Z. Jin and Y.-S. Yang, *ACS Appl. Mater. Int.*, 2015, **7**, 26257.
5. H. Pan, K. S. Han, M. H. Engelhard, R. Cao, J. Chen, J.-G. Zhang, K. T. Mueller, Y. Shao and J. Liu, *Adv. Funct. Mater.*, 2018, **28**, 1707234.
6. H. M. Kim, H.-H. Sun, I. Belharouak, A. Manthiram and Y.-K. Sun, *ACS Energy Lett.* 2016, **1**, 136-141.
7. L. Qie and A. Manthiram, *ACS Energy Lett.* 2016, **1**, 46-51.
8. A. Schneider, C. Weidmann, C. Suchomski, H. Sommer, J. Janek and T. Brezesinski, *Chem. Mater.* 2015, **27**, 1674-1683.
9. Y. Mi, W. Liu, J. Jiang, G. W. Brudvig, H. Zhou and H. A. Wang, *J. Mater. Chem. A* 2017, **5**, 11788-11793.
10. T. Chen, B. Cheng, G. Zhu, R. Chen, Y. Hu, L. Ma, H. Lv., Y. Wang, J. Liang, Z. Tie, Z. Jin and Z. Liu, *Nano Lett.* 2017, **17**, 437-444.
11. L. J. Seop, J. Jaemoon, J. Jyongsik and A. Manthiram, *Small* 2017, **13**, 1602984.
12. Z. Liu, B. Liu, P. Guo, X. Shang, M. Lv, D. Liu and D. He, *Electrochim. Acta* 2018, **269**, 180-187.
13. J. Zhu, Y. Ge, D. Kim, Y. Lu, C. Chen, M. Jiang and X. Zhang, *Nano Energy* 2016, **20**, 176-184.
14. S. Waluś, A. Robba, R. Bouchet, C. Barchasz and F. Alloin, *Electrochim. Acta* 2016, **210**, 492-501.
15. D. Lv, J. Zheng, Q. Li, X. Xie, S. Ferrara, Z. Nie, L. B. Mehdi, N. D. Browning, J. Zhang, G. L. Graff and J. Xiao, *Adv. Energy Mater.* 2015, **5**, 1402290.
16. J. Song., T. Xu, M. L. Gordin, P. Zhu, D. Lv, Y.-B. Jiang, Y. Chen, Y. Duan and D. Wang, *Adv. Funct. Mater.* 2014, **24**, 1243-1250.

17. J. Balach, T. Jaumann, M. Klose, S. Oswald, J. Eckert and L. Giebeler, *Adv. Funct. Mater.* 2015, 25, 5285-5291.
18. Z. Li, J. Zhang and X. W. Lou, *Angew. Chem. Int. Ed.* 2015, 54, 12886-12890.
19. S. Liu, Y. Li, X. Hong, J. Xu, Z. Chunman and K. Xie, *Electrochim. Acta* 2016, 188, 516-522.
20. J. Balach, T. Jaumann, M. Klose, S. Oswald, J. Eckert and L. Giebeler, *J. Power Sources* 2016, 303, 317-324.
21. G. Ma, Z. Wen, Q. Wang, C. Shen, P. Peng, J. Jin and X. Wu, *J. Power Sources* 2015, 273, 511-516.
22. G. Ai, Y. Dai, W. Mao, H. Zhao, Y. Fu, X. Song, Y. En, V. S. Battaglia, V. Srinivasan and G. Liu, *Nano Lett.* 2016, 16, 5365-5372.
